# Supplementary material for: A computational prospective on isoform-selective CB2 inhibitors
Source: Royal Society of Chemistry journal article supplement (doi:10.1039/d1nj02296b), 2021-01-01
Supplement: d1nj02296b1.pdf [file d1nj02296b1.pdf]

## **A computational prospective for isoform-selective CB2 inhibitors**

Yi Zhao<sup>a</sup>, Ying Wang<sup>b</sup>, Huibin Wang<sup>a</sup>, Baichun Hu<sup>c,d</sup>, Zhaohu Luo<sup>b</sup>, Fengjiao Zhang<sup>b\*</sup>

*a. School of Pharmacy, Shenyang Pharmaceutical University, Shenyang 110016, People's Republic of China*

*b. Wuya College of Innovation, Shenyang Pharmaceutical University, Shenyang 110016, People's Republic of China*

*c. Key Laboratory of Structure-Based Drug Design & Discovery of Ministry of Education, Shenyang Pharmaceutical University, Shenyang 110016, People's Republic of China*

*d. School of Pharmaceutical Engineering, Shenyang Pharmaceutical University, Shenyang 110016, People's Republic of China*

Zhao Y. and Wang Y. contributed equally to this work.

Corresponding author: Fengjiao Zhang, E-mail: [zhangfengjiao@syphu.edu.cn](mailto:zhangfengjiao@syphu.edu.cn).

## Table of contents

|                        |   |
|------------------------|---|
| <i>Figure S1</i> ..... | 3 |
| <i>Figure S2</i> ..... | 4 |
| <i>Figure S3</i> ..... | 5 |
| <i>Figure S4</i> ..... | 6 |
| <i>Table S1</i> .....  | 6 |
| <i>Table S2</i> .....  | 6 |

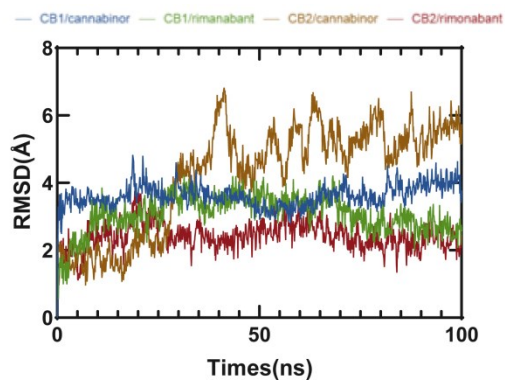

**Figure S1.** RMSD evaluation of ligands throughout the MD simulation referring to protein.

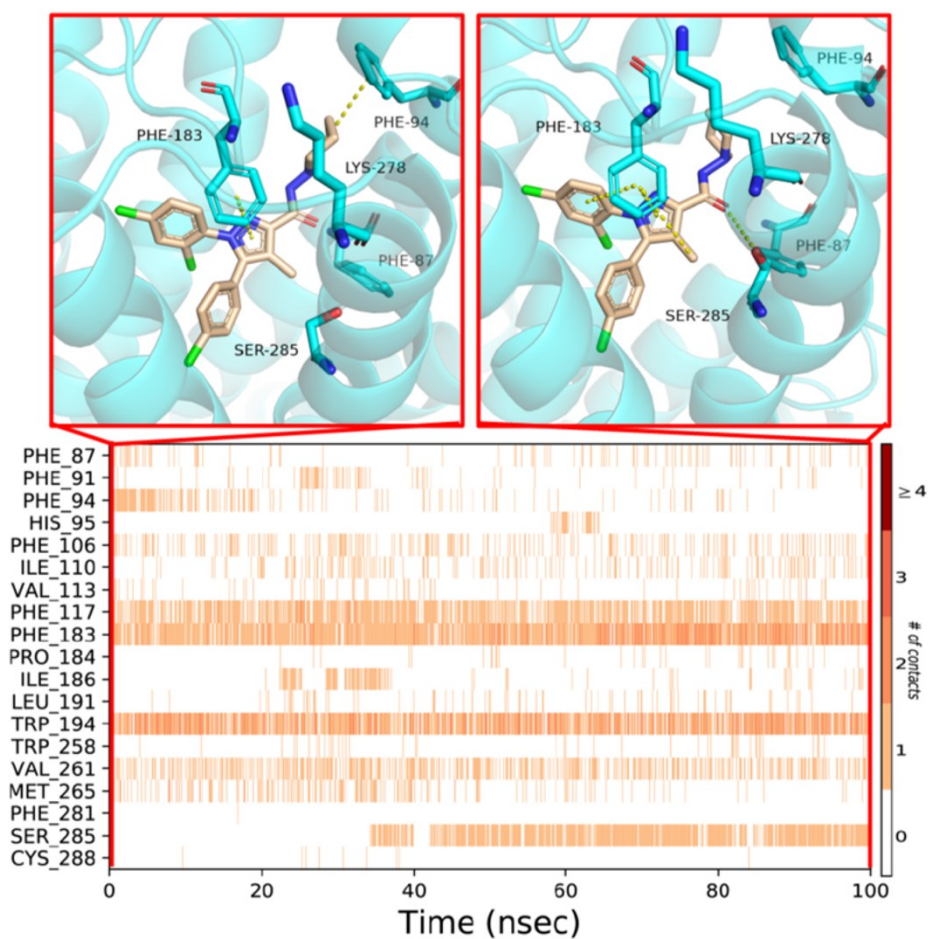

**Figure S2** The protein-ligand interactions analysis of CB2/ rimonabant complex during MD simulation. The interactions were shown as a timeline representation, and the initial and final

conformation were displayed in the top panel.

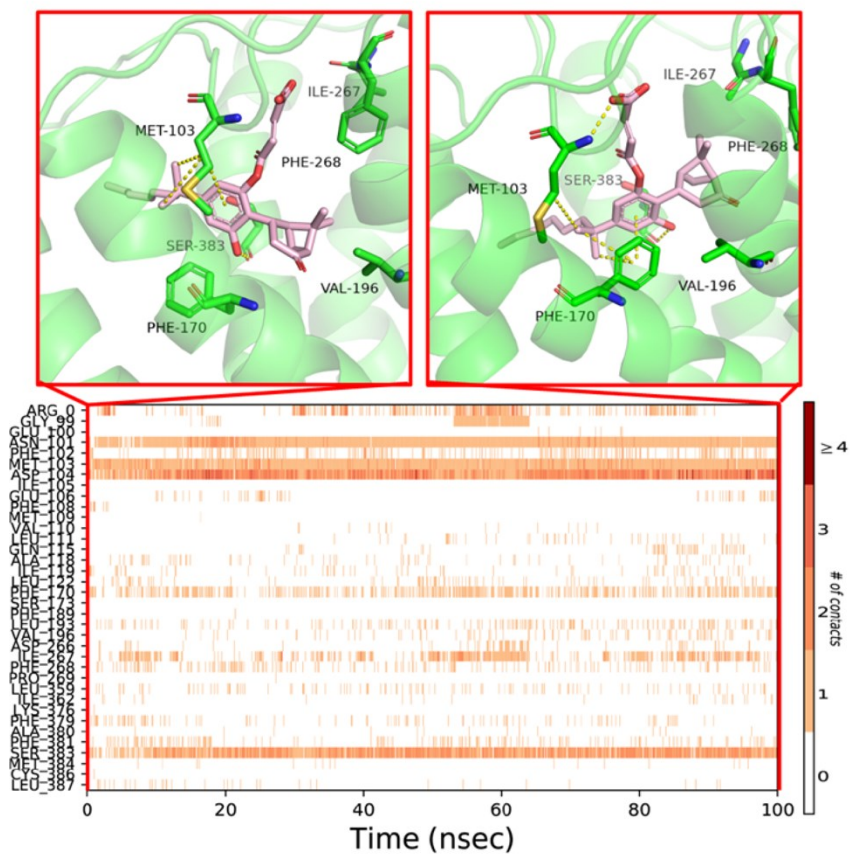

**Figure S3** The protein-ligand interactions analysis of CB1/cannabinor complex during MD simulation. The interactions were shown as a timeline representation, and the initial and final conformation were displayed in the top panel.

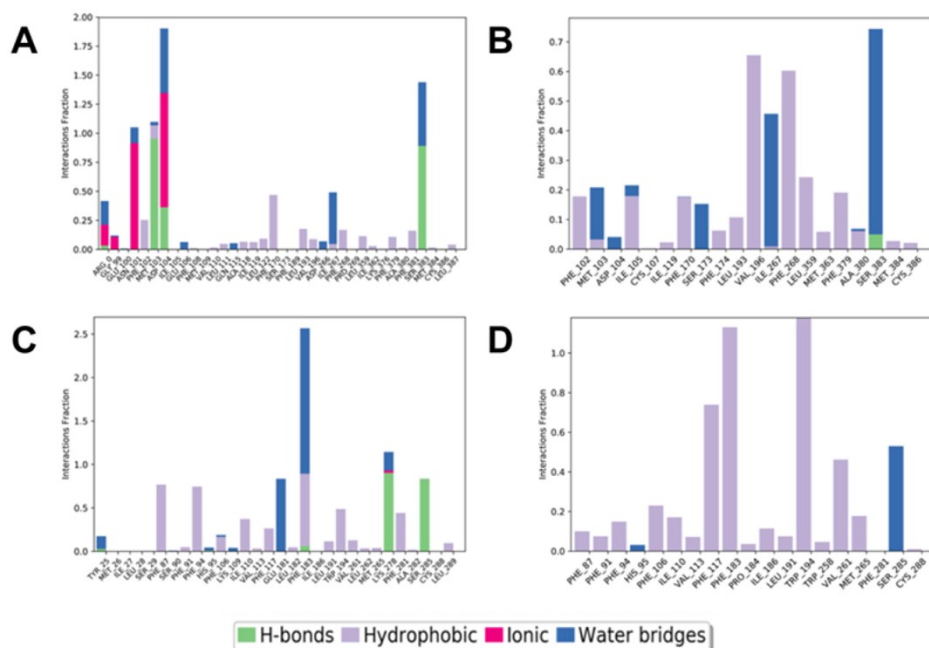

**Figure S4.** Sustainability of protein-ligand interaction during the MD simulation. Protein-ligand interactions of CB1/cannabinor (A), CB1/rimonabant (B), CB2/cannabinor (C) and CB2/rimonabant (D) by simulation.

**Table S1.** Alanine scanning mutagenesis analysis of CB1.

| Residues   | 102   | 103   | 105   | 170   | 173  | 196   | 268   | 359   | 379   | 383  |
|------------|-------|-------|-------|-------|------|-------|-------|-------|-------|------|
| rimonabant | 27.14 | 32.33 | 20.24 | 17.12 | 2.65 | 13.96 | 25.22 | 16.35 | 24.78 | 1.38 |
| cannabinor | 21.68 | 26.80 | 9.94  | 18.65 | 3.67 | 12.79 | 23.60 | 15.77 | 15.27 | 0.49 |

**Table S2.** Alanine scanning mutagenesis analysis of CB2.

| Residues   | 87    | 94    | 110   | 117   | 183   | 194   | 278   | 281   | 285  |
|------------|-------|-------|-------|-------|-------|-------|-------|-------|------|
| rimonabant | 21.57 | 24.01 | 25.73 | 13.71 | 23.66 | 31.70 | 10.72 | 20.01 | 2.47 |
| cannabinor | 23.75 | 19.91 | 24.53 | 16.25 | 28.80 | 31.75 | 9.63  | 23.66 | 5.81 |
